# Supplementary material for: High Level of Pre-Treatment HIV-1 Drug Resistance and Its Association with HLA Class I-Mediated Restriction in the Pumwani Sex Worker Cohort
Source: MDPI journal article supplement (doi:10.3390/v14020273), 2022-01-28
Supplement: s1 [file s1]

**Table S1.** Prevalence of selected HIV-1 drug resistant mutations among the participants from different countries.

| Drug Class | DRMs   | Prevalence (%)   |                     |                  | <i>P</i> value * |
|------------|--------|------------------|---------------------|------------------|------------------|
|            |        | Kenya<br>(n=126) | Tanzania<br>(n=123) | Uganda<br>(n=14) |                  |
| NNTI       | M184I  | 40.2             | 43.9                | 28.6             | 0.7423           |
|            | K65R   | 4.7              | 11.4                | 7.1              | 0.7114           |
| NNRTI      | E138AK | 18.1             | 7.3                 | 7.1              | 0.1999           |
|            | K101EN | 5.5              | 4.9                 | 0.0              | 0.8304           |
|            | G190ES | 7.1              | 6.5                 | 0.0              | 0.8643           |
|            | K103E  | 75.6             | 78.8                | 85.7             | 0.7822           |
| PI         | D30N   | 7.8              | 13.8                | 14.3             | 0.3772           |
|            | M46I   | 6.3              | 12.2                | 16.7             | 0.2970           |
| INSTI      | E138K  | 6.3              | 8.1                 | 7.1              | 0.8731           |
|            | T97A   | 12.6             | 15.4                | 28.6             | 0.4071           |

DRMs which prevalence is more than 5% in all participants were selected.

\* *P* value is calculated based on chi-square test.

NRTI: nucleos(t)ide analogue reverse transcriptase inhibitor.

NNRTI: non-nucleo(t)side analogue reverse transcriptase inhibitor.

PI: protease inhibitor

INSTI: integrase strand transfer inhibitor.
